CORRECTION

# Correction: Nitrosothiol-Trapping-Based Proteomic Analysis of S-Nitrosylation in Human Lung Carcinoma Cells

Shani Ben-Lulu, Tamar Ziv, Pnina Weisman-Shomer, Moran Benhar

The concentration unit for LPS is listed incorrectly in the third sentence under the subheading “Cell culture and treatment” in the Materials and Methods section. The correct sentence is: For this purpose, cells were serum starved for 24 h and then stimulated for 72 h with or without a cytokine mix that included lipopolysaccharide (LPS, 0.5  $\mu\text{g/ml}$ ), tumor necrosis factor ( $\text{TNF}\alpha$ , 20  $\text{ng/ml}$ ), interferon- $\gamma$  (IFN- $\gamma$ , 10  $\text{ng/ml}$ ) and interleukin 1 $\beta$  (IL-1 $\beta$ , 10  $\text{ng/ml}$ ).

The concentration unit for LPS in the caption for [Fig 1C](#) is also incorrect. Please see the corrected [Fig 1](#) caption here.

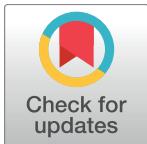

**OPEN ACCESS**

**Citation:** Ben-Lulu S, Ziv T, Weisman-Shomer P, Benhar M (2017) Correction: Nitrosothiol-Trapping-Based Proteomic Analysis of S-Nitrosylation in Human Lung Carcinoma Cells. PLoS ONE 12(6): e0179803. <https://doi.org/10.1371/journal.pone.0179803>

**Published:** June 12, 2017

**Copyright:** © 2017 Ben-Lulu et al. This is an open access article distributed under the terms of the [Creative Commons Attribution License](#), which permits unrestricted use, distribution, and reproduction in any medium, provided the original author and source are credited.

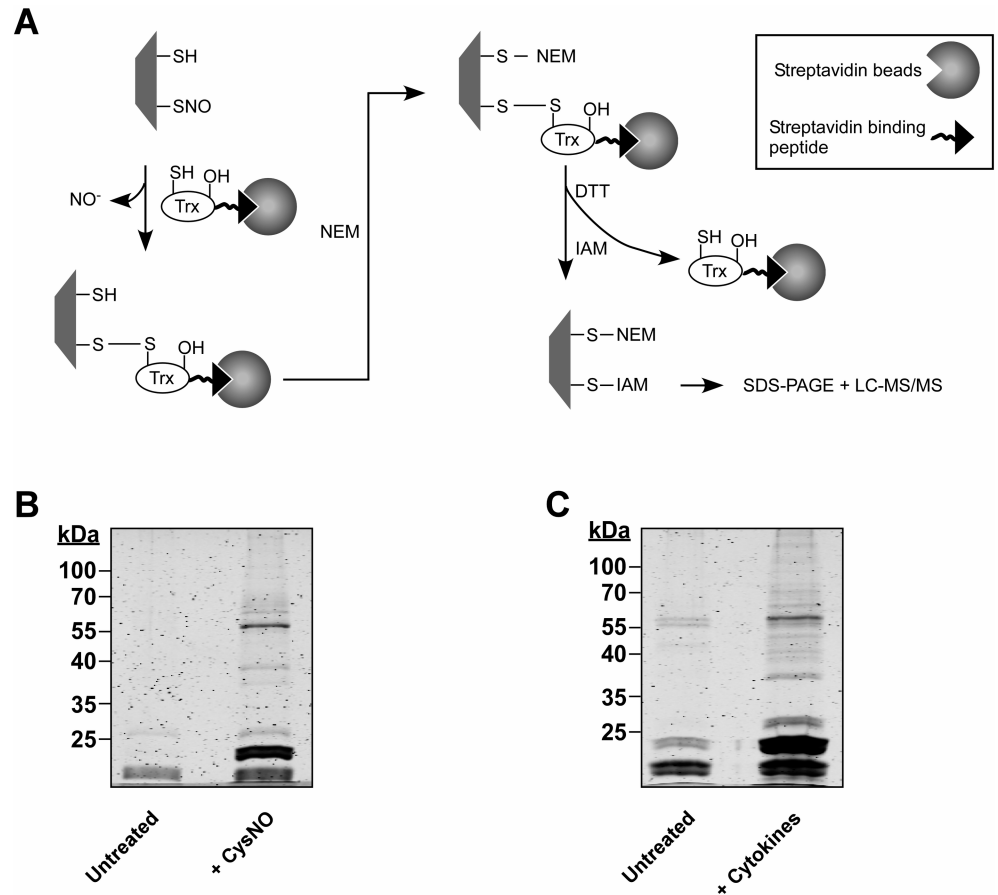

**Fig 1. SNO trapping-based analysis of S-Nitrosylation in A549 cells.** (A) Schematic of the proteomic approach. Digitonin cell lysates, obtained from A549 treated with NO donor or with cytokines are incubated with a thioredoxin (Trx) trap mutant, Trx(C35S). In the trap mutant the resolving cysteine is replaced by serine (-OH). The protein also contains a streptavidin binding peptide. Trx(C35S) forms mixed disulfide bonds with nitrosylated substrates and the resulting complexes are pulled-down using avidin agarose. Identification of nitrosylation sites is assisted by differential thiol labeling, involving the sequential application of N-ethylmaleimide (NEM) and iodoacetamide (IAM). Proteins captured in the Trx pull-down are analyzed by SDS-PAGE or liquid chromatography-tandem mass spectrometry (LC-MS/MS). (B) A549 cells were treated with or without 500  $\mu$ M S-nitrosocysteine (CysNO) for 10 min and thereafter digitonin lysates were incubated with Trx(C35S). Proteins captured by Trx were released by DTT and then analyzed by SDS-PAGE. Gels were stained with Krypton fluorescent protein stain and visualized using the Odyssey infrared imaging system. (C) A549 cells were treated for 72 h with LPS (0.5  $\mu$ g/ml) and a cytokine mixture that included TNF $\alpha$  (20 ng/ml), IFN- $\gamma$  (10 ng/ml) and IL-1 $\beta$  (10 ng/ml). Trx-based trapping of nitrosylated proteins was performed as in B.

<https://doi.org/10.1371/journal.pone.0179803.g001>

## Reference

1. Ben-Lulu S, Ziv T, Weisman-Shomer P, Benhar M (2017) Nitrosothiol-Trapping-Based Proteomic Analysis of S-Nitrosylation in Human Lung Carcinoma Cells. *PLoS ONE* 12(1): e0169862. <https://doi.org/10.1371/journal.pone.0169862> PMID: 28081246
